# Supplementary material
Source: PubMed Central journal article supplement (PMC7594387)

**Supplemental figure 1. A) Overall survival, B) disease-free survival, C) relapse/progression, D) non-relapse mortality, E) grade II-IV acute GVHD and F) moderate-to-severe chronic GVHD, according to the total number of HLA mismatches (5 vs. 1-4).**

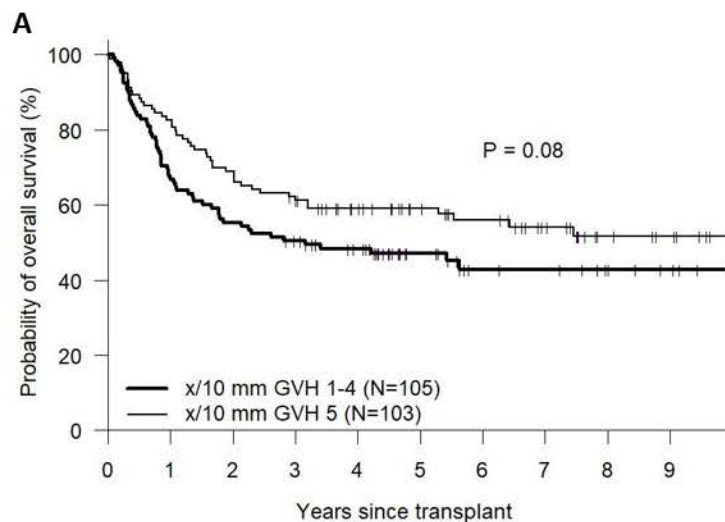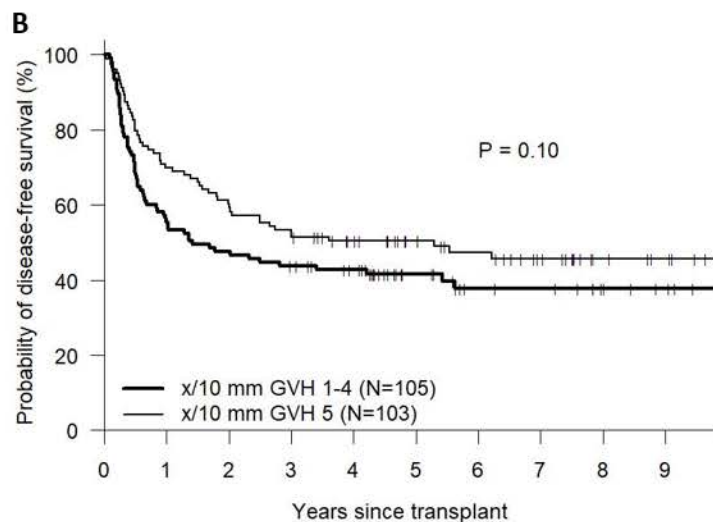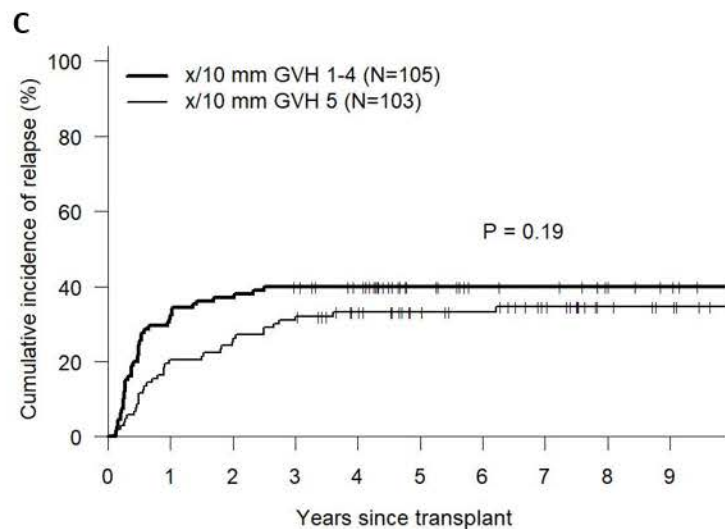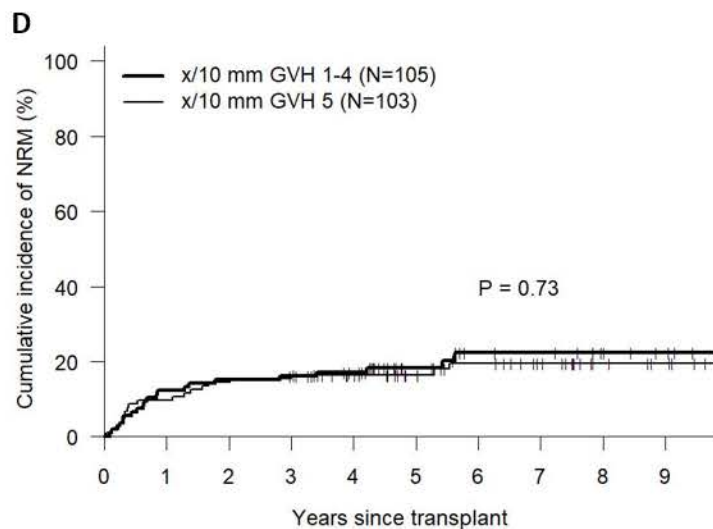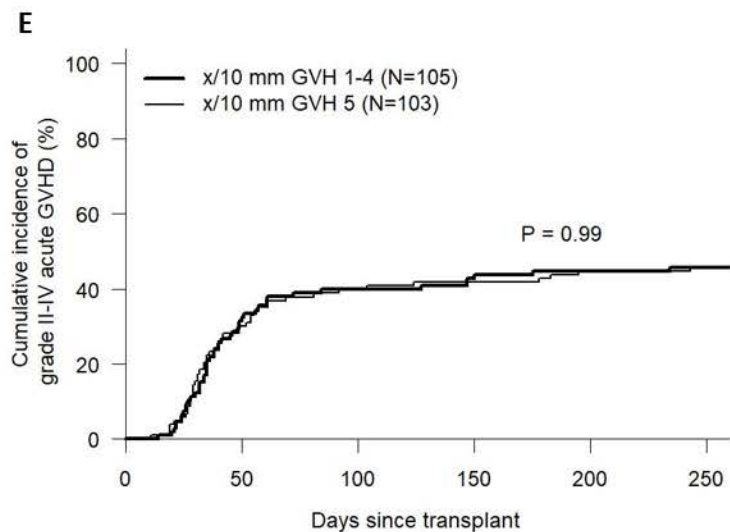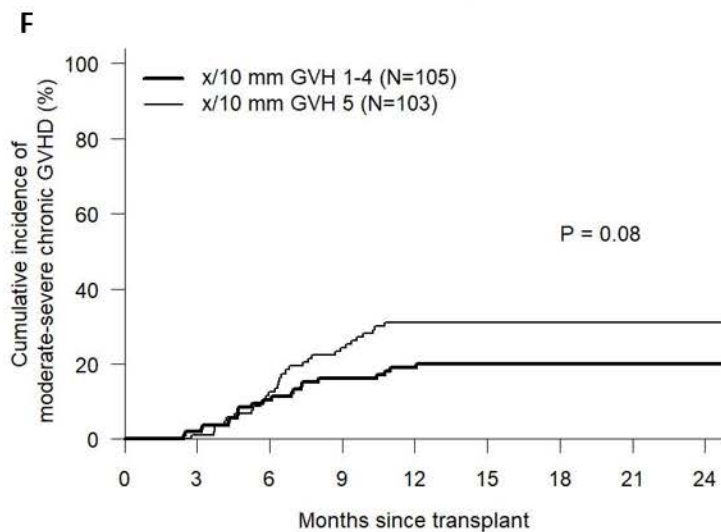

**Supplemental figure 2. Cumulative incidence of grade II-IV acute GVHD according to presence/absence of an HLA mismatch at A) HLA-A, B) HLA-B, C) HLA-C, D) HLA-DR, E) HLA-DQ and F) non-permissive HLA-DP.**

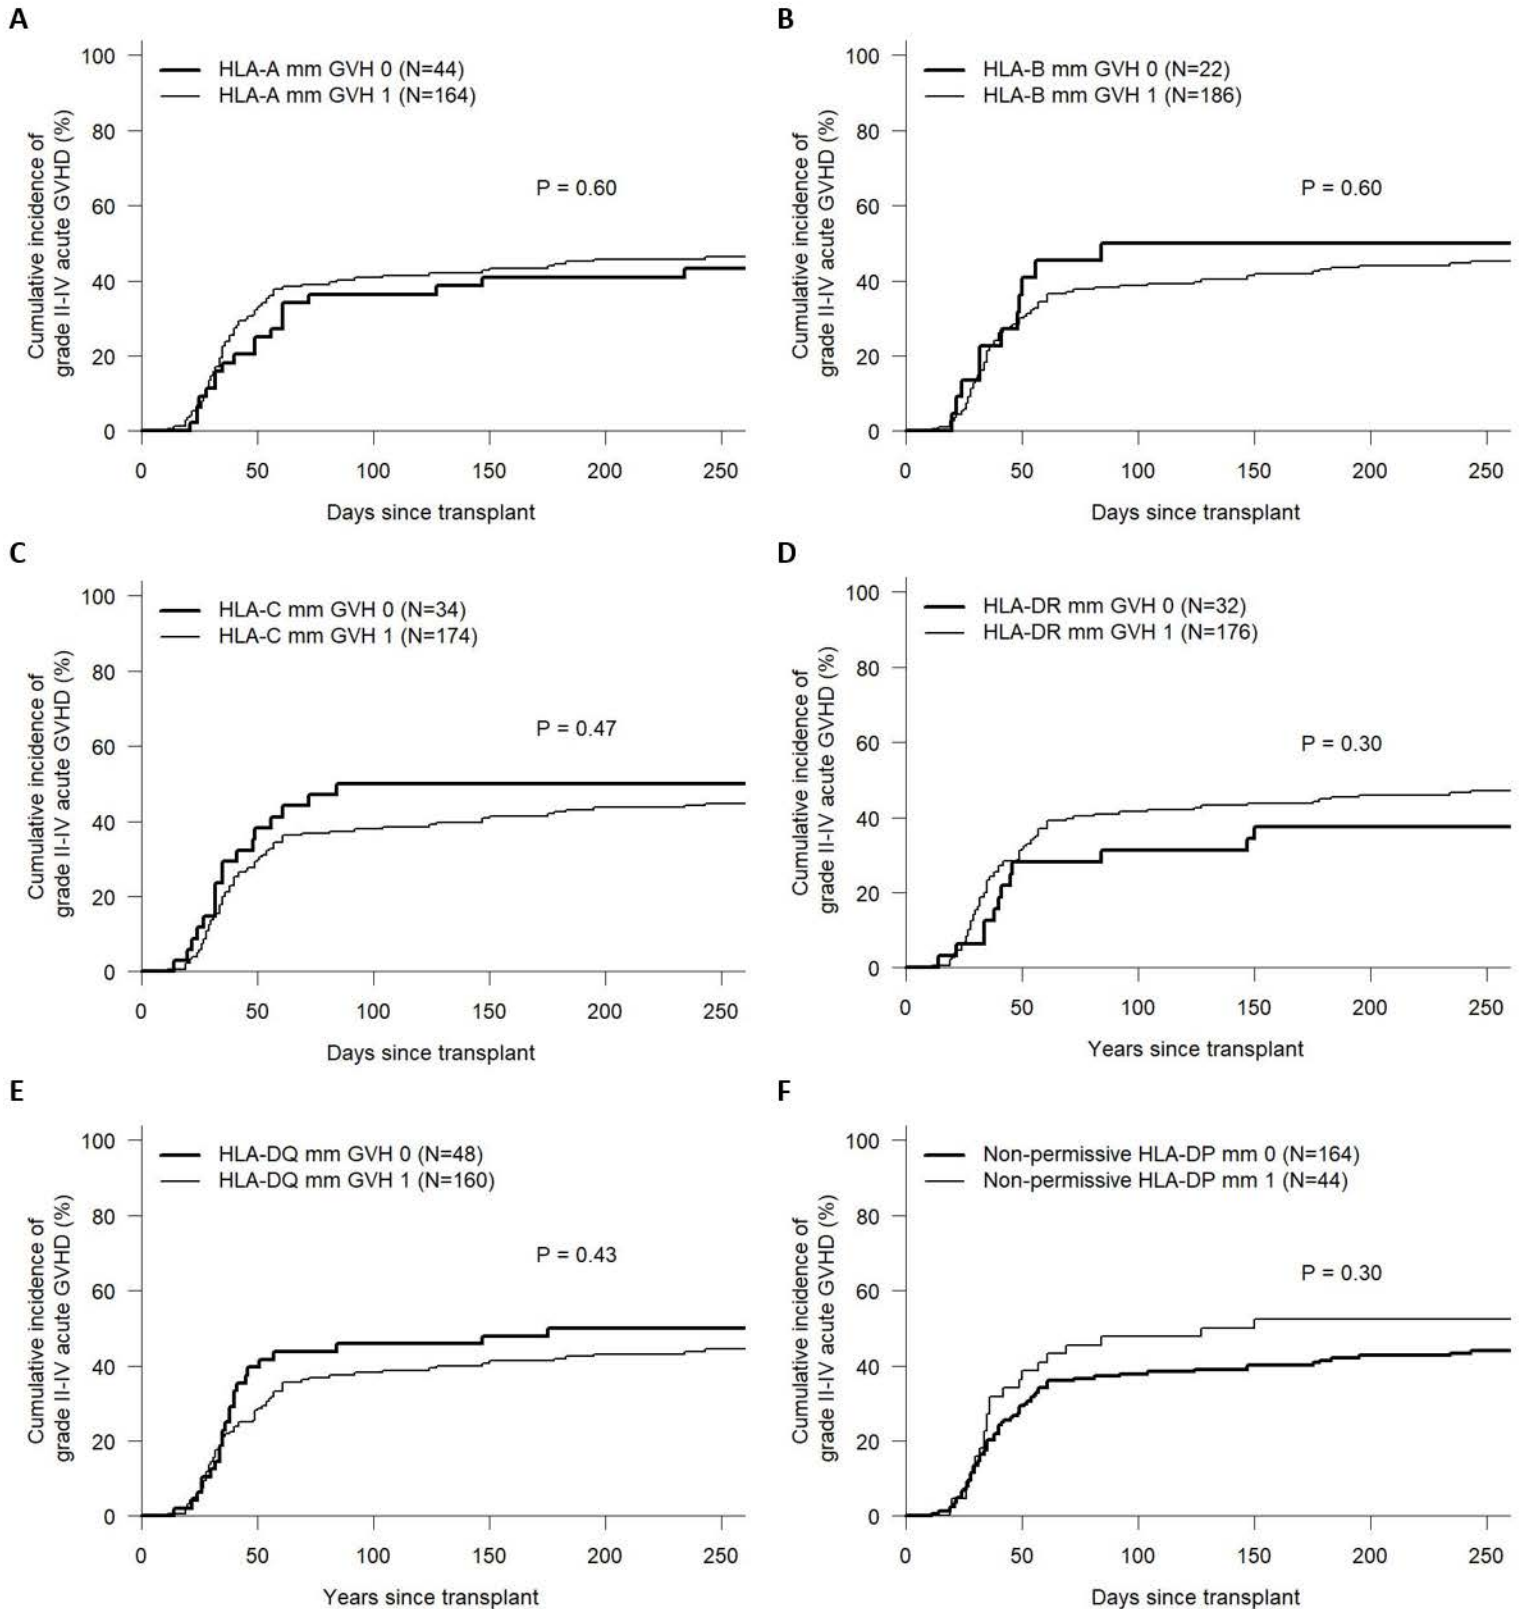

Supplement: advancesADV2020003110-suppl1.pdf [file advancesADV2020003110-suppl1.pdf]
